# Supplementary material
Source: PubMed Central journal article supplement (PMC4920357)
Supplement: NIHMS268529-supplement-1_si_001.pdf [file NIHMS268529-supplement-1_si_001.pdf]

# Resistive Pulse Analysis Microgel Deformation During Nanopore Translocation

*Deric A. Holden, Grant Hendrickson, L. Andrew Lyon, and Henry S. White*

## Capture and Release of 570-nm Microgel Particles at GNMs of radii < 375-nm

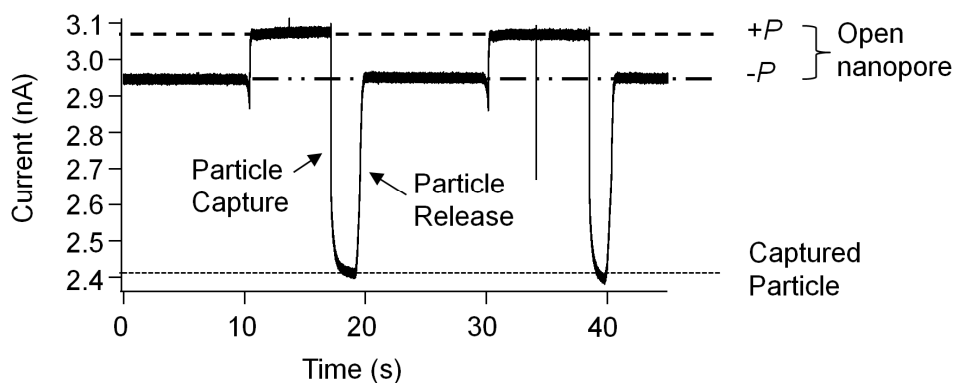

**Figure S1.** An  $i$ - $t$  trace showing the capture and release of a microgel particle. The experiment was performed using a 358-nm GNM, in a 10 mM KCl, 1 mM PBS (pH 7) solution, with an applied voltage and pressure of +0.1 V and -50 mmHg, respectively (internal vs. external). Particles captured at  $-P$  are held at the GNM orifice until the pressure is reversed to  $+P$ . The difference in the currents of the open nanopore at  $+P$  and  $-P$  is due to the pressure-dependent ion distribution inside the nanopore.

## Analysis of the Probability of Overlapping Translocation Events

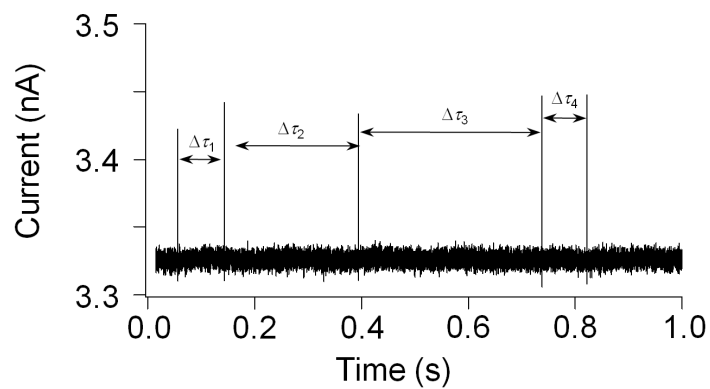

**Figure S2.** A portion of a 60.85 sec *i-t* trace recording 570-nm-radius microgel particle translocation events through a 433-nm-radius GNM. The experiment was performed in a 10 mM KCl, 1 mM PBS (pH 7) solution with an applied voltage and pressure of +0.1 V and -50 mmHg, respectively (internal vs. external).
